# Supplementary material for: Coordinated inheritance of extrachromosomal DNAs in cancer cells
Source: Nature. 2024 Nov 6;635(8037):201–9. doi: 10.1038/s41586-024-07861-8 (PMC11541006; doi:10.1038/s41586-024-07861-8)
Supplement: Supplementary file 1 — CRISPR guide RNA sequences. [file 41586_2024_7861_MOESM1_ESM.pdf]

---

**Supplementary information**

---

**Coordinated inheritance of  
extrachromosomal DNAs in cancer cells**

---

In the format provided by the  
authors and unedited

## Supplementary Tables

**Supplementary Table 1.**

| <b>Guide RNA target sequence</b> | <b>Guide RNA information</b> |
|----------------------------------|------------------------------|
| CCAGCAATCGTTAACCACTG             | <i>MYC</i> guide 3           |
| CTTCGGGGAGACAACGACGG             | <i>MYC</i> guide 5           |
| GTGATATTTGAACCGCCCTG             | <i>MYC</i> guide 7           |
| GTCTTGCTAGACTATACCAG             | <i>MYC</i> guide 19          |
| GGAGTCCATTGCACCGGCCG             | <i>CIP2A</i> guide           |
| GAACGACTAGTTAGGCGTGTA            | Non-targeting control guide  |
